# Supplementary material for: Knowledge of and Attitudes to Influenza Vaccination among Community Pharmacists in Catalonia (Spain). 2013–2014 Season: A Cross Sectional Study
Source: MDPI journal article supplement (doi:10.3390/ijerph14070756), 2017-07-11
Supplement: s1 [file s1]

Table S1. Distribution of characteristics of all pharmacists finally analyzed

| Characteristics                                                                     | Community pharmacist<br>( <i>n</i> = 463) |
|-------------------------------------------------------------------------------------|-------------------------------------------|
| <b>Age group</b>                                                                    |                                           |
| ≤34 years                                                                           | 57 (12.3%)                                |
| 35–44 years                                                                         | 147 (31.7%)                               |
| 45–54 years                                                                         | 154 (33.3%)                               |
| ≥55 years                                                                           | 105 (22.7%)                               |
| <b>Sex</b>                                                                          |                                           |
| Female                                                                              | 360 (77.8%)                               |
| Male                                                                                | 103 (22.2%)                               |
| <b>Professional category</b>                                                        |                                           |
| Titular pharmacist                                                                  | 280 (60.5%)                               |
| Assistant pharmacist                                                                | 58 (12.5%)                                |
| Substitute pharmacist                                                               | 125 (27.0%)                               |
| <b>Years of work</b>                                                                |                                           |
| ≤ 9 years                                                                           | 57 (12.3%)                                |
| 10–29 years                                                                         | 310 (67.0%)                               |
| ≥ 30 years                                                                          | 96 (20.7%)                                |
| <b>Type of population</b>                                                           |                                           |
| Rural                                                                               | 120 (25.9%)                               |
| Urban                                                                               | 324 (70.0%)                               |
| <b>Seasonal vaccination 2013/14</b>                                                 |                                           |
| Yes                                                                                 | 116 (25.1%)                               |
| <b>Seasonal vaccination in any of the three preceding seasons</b>                   |                                           |
| Yes                                                                                 | 167 (36.1%)                               |
| <b>Seasonal vaccination in all three preceding seasons</b>                          |                                           |
| Yes                                                                                 | 111 (24.0%)                               |
| <b>Vaccination with pandemic vaccine 2009-2010</b>                                  |                                           |
| Yes                                                                                 | 167 (36.1%)                               |
| <b>I recommend the vaccine to pregnant women in their first trimester</b>           |                                           |
| Yes                                                                                 | 138 (29.8%)                               |
| <b>I recommend the vaccine to pregnant women in their second or third trimester</b> |                                           |
| Yes                                                                                 | 204 (44.1%)                               |
| <b>I recommend the vaccine to post-partum women</b>                                 |                                           |
| Yes                                                                                 | 143 (30.9%)                               |
| <b>I recommend the vaccine to people with chronic disorders</b>                     |                                           |
| Yes                                                                                 | 439 (94.8%)                               |
| <b>I recommend the vaccine to immunosuppressed people</b>                           |                                           |
| Yes                                                                                 | 295 (63.7%)                               |
| <b>I recommend the vaccine to persons aged &gt; 65 years</b>                        |                                           |
| Yes                                                                                 | 440 (95.0%)                               |
